# Supplementary material
Source: PubMed Central journal article supplement (PMC5850490)
Supplement: dex237supplementarytablesi.pdf [file dex237supplementarytablesi.pdf]

**Supplementary Table S1** Adjusted mean embryo quality following ART by alcohol and caffeine intake in 279 women (290 unique FFQs, 389 fresh ART cycles with egg retrieval) from the EARTH Study.

| Categories,<br>range         | Adjusted percentages (95% CI) <sup>a</sup> |                  |                 |                        |
|------------------------------|--------------------------------------------|------------------|-----------------|------------------------|
|                              | Accelerated<br>cleavage                    | Slow<br>cleavage | Poor<br>Quality | Best quality<br>embryo |
| Alcohol intake (g/day)       |                                            |                  |                 |                        |
| 0.0                          | 9 (5–17)                                   | 33 (23–46)       | 16 (9–28)       | 53 (32–73)             |
| 0.1–6.0                      | 10 (6–14)                                  | 28 (22–35)       | 13 (9–19)       | 52 (40–64)             |
| 6.1–12.0                     | 10 (6–15)                                  | 26 (19–34)       | 13 (8–20)       | 60 (45–73)             |
| 12.1–24.0                    | 10 (6–15)                                  | 25 (19–33)       | 15 (10–22)      | 66 (52–78)             |
| 24.1–85.8                    | 6 (3–15)                                   | 27 (16–42)       | 17 (8–32)       | 52 (28–75)             |
| <i>P</i> -trend <sup>b</sup> | 0.49                                       | 0.48             | 0.55            | 0.38                   |
| Caffeine intake (mg/day)     |                                            |                  |                 |                        |
| 0.3–50                       | 10 (6–15)                                  | 27 (20–34)       | 12 (8–17)       | 51 (38–64)             |
| 50.1–100                     | 11 (6–19)                                  | 20 (13–29)       | 10 (6–18)       | 53 (34–72)             |
| 101.1–200                    | 8 (5–12)                                   | 30 (24–38)       | 18 (13–25)      | 55 (42–68)             |
| 200.1–300                    | 11 (7–17)                                  | 26 (19–34)       | 12 (8–19)       | 70 (55–82)             |
| 300.1–642                    | 11 (5–24)                                  | 30 (18–46)       | 21 (10–38)      | 64 (37–85)             |
| <i>P</i> -trend <sup>b</sup> | 0.73                                       | 0.67             | 0.27            | 0.09                   |

<sup>a</sup>Data are presented as predictive marginal means adjusted for age, BMI, infertility diagnosis, race, smoking status, alcohol, caffeine, calorie, folate and vitamin B12 intake, and dietary patterns, with continuous covariates at their mean level and categorical measures estimated at their reference level.

<sup>b</sup>Tests for trend were performed using the median level of caffeine and alcohol intake in each group as a continuous variable in the model.
