# Supplementary material
Source: PubMed Central journal article supplement (PMC5850490)
Supplement: dex237supplementarytablesii.pdf [file dex237supplementarytablesii.pdf]

**Supplementary Table SII Adjusted mean implantation, clinical pregnancy and live birth following ART by alcohol and caffeine intake in 300 women (313 unique FFQs, 493 ART cycles) from the EARTH Study.**

| Categories, range            | Number of unique FFQs/cycles | Adjusted proportions (95% CI) <sup>a</sup> |                    |                  |
|------------------------------|------------------------------|--------------------------------------------|--------------------|------------------|
|                              |                              | Implantation                               | Clinical pregnancy | Live birth       |
| <b>Beer</b>                  |                              |                                            |                    |                  |
| <1 serving per month         | 177/274                      | 0.65 (0.55–0.73)                           | 0.55 (0.46–0.64)   | 0.43 (0.34–0.53) |
| 1–4 servings per month       | 94/144                       | 0.69 (0.58–0.79)                           | 0.60 (0.48–0.70)   | 0.47 (0.35–0.59) |
| ≥2 servings per week         | 42/75                        | 0.58 (0.43–0.71)                           | 0.47 (0.34–0.61)   | 0.37 (0.25–0.51) |
| <i>P</i> -trend <sup>b</sup> |                              | 0.25                                       | 0.20               | 0.30             |
| <b>Wine</b>                  |                              |                                            |                    |                  |
| <1 serving per month         | 87/132                       | 0.60 (0.47–0.72)                           | 0.55 (0.42–0.67)   | 0.42 (0.30–0.55) |
| 1–4 serving per month        | 40/61                        | 0.60 (0.40–0.74)                           | 0.56 (0.40–0.70)   | 0.45 (0.30–0.60) |
| 2–4 servings per week        | 93/164                       | 0.66 (0.56–0.75)                           | 0.55 (0.44–0.64)   | 0.42 (0.32–0.53) |
| 5–7 servings per week        | 71/102                       | 0.70 (0.57–0.81)                           | 0.61 (0.48–0.73)   | 0.47 (0.34–0.61) |
| ≥2 drinks per day            | 22/34                        | 0.61 (0.40–0.79)                           | 0.44 (0.25–0.65)   | 0.40 (0.21–0.61) |
| <i>P</i> -trend <sup>b</sup> |                              | 0.62                                       | 0.80               | 0.81             |
| <b>Spirits</b>               |                              |                                            |                    |                  |
| <1 serving per month         | 133/207                      | 0.64 (0.53–0.73)                           | 0.54 (0.44–0.64)   | 0.45 (0.35–0.55) |
| 1–3 servings per month       | 90/130                       | 0.67 (0.56–0.77)                           | 0.57 (0.46–0.68)   | 0.40 (0.29–0.52) |
| ≥1 serving per week          | 90/156                       | 0.64 (0.52–0.74)                           | 0.55 (0.43–0.65)   | 0.44 (0.33–0.55) |
| <i>P</i> -trend <sup>b</sup> |                              | 0.83                                       | 0.89               | 0.99             |
| <b>Caffeinated coffee</b>    |                              |                                            |                    |                  |
| <1 serving per month         | 105/171                      | 0.66 (0.56–0.75)                           | 0.57 (0.47–0.67)   | 0.43 (0.33–0.54) |
| 1–4 serving per month        | 32/49                        | 0.67 (0.51–0.80)                           | 0.57 (0.41–0.72)   | 0.51 (0.34–0.67) |
| 2–6 serving per week         | 51/79                        | 0.61 (0.46–0.74)                           | 0.48 (0.35–0.62)   | 0.33 (0.21–0.47) |
| 1 serving per day            | 71/110                       | 0.61 (0.48–0.72)                           | 0.51 (0.39–0.63)   | 0.41 (0.29–0.54) |
| ≥2 servings per day          | 54/84                        | 0.63 (0.49–0.75)                           | 0.57 (0.43–0.70)   | 0.43 (0.30–0.57) |
| <i>P</i> -trend <sup>b</sup> |                              | 0.64                                       | 0.98               | 0.99             |
| <b>Decaffeinated coffee</b>  |                              |                                            |                    |                  |
| <1 serving per month         | 221/355                      | 0.63 (0.54–0.71)                           | 0.55 (0.46–0.64)   | 0.42 (0.33–0.51) |
| 1–4 servings per month       | 35/52                        | 0.71 (0.55–0.83)                           | 0.58 (0.42–0.72)   | 0.49 (0.33–0.64) |
| 2–6 serving per week         | 37/55                        | 0.70 (0.54–0.82)                           | 0.57 (0.41–0.71)   | 0.49 (0.33–0.64) |
| ≥1 servings per day          | 20/31                        | 0.54 (0.34–0.73)                           | 0.50 (0.31–0.69)   | 0.39 (0.22–0.60) |
| <i>P</i> -trend <sup>b</sup> |                              | 0.60                                       | 0.70               | 0.95             |
| <b>Total soda</b>            |                              |                                            |                    |                  |
| <1 serving per month         | 153/228                      | 0.65 (0.55–0.74)                           | 0.54 (0.44–0.64)   | 0.43 (0.34–0.54) |
| 1–4 serving per month        | 75/124                       | 0.66 (0.55–0.76)                           | 0.57 (0.46–0.68)   | 0.42 (0.31–0.54) |
| 2–6 servings per week        | 59/102                       | 0.60 (0.46–0.72)                           | 0.52 (0.39–0.65)   | 0.38 (0.26–0.52) |
| ≥1 serving per day           | 26/39                        | 0.58 (0.38–0.76)                           | 0.56 (0.37–0.74)   | 0.47 (0.29–0.67) |
| <i>P</i> -trend <sup>b</sup> |                              | 0.37                                       | 0.99               | 0.77             |
| <b>Caffeinated soda</b>      |                              |                                            |                    |                  |
| <1 serving per month         | 202/311                      | 0.66 (0.56–0.74)                           | 0.54 (0.45–0.63)   | 0.42 (0.33–0.52) |
| 1–4 serving per month        | 61/90                        | 0.68 (0.55–0.78)                           | 0.61 (0.48–0.72)   | 0.49 (0.36–0.62) |
| 2–6 servings per week        | 42/79                        | 0.55 (0.41–0.69)                           | 0.49 (0.35–0.63)   | 0.37 (0.24–0.51) |
| ≥1 serving per day           | 8/13                         | 0.46 (0.17–0.77)                           | 0.43 (0.16–0.75)   | 0.33 (0.10–0.68) |
| <i>P</i> -trend <sup>b</sup> |                              | 0.15                                       | 0.37               | 0.43             |
| <b>Decaffeinated soda</b>    |                              |                                            |                    |                  |
| <1 serving per month         | 235/361                      | 0.66 (0.57–0.74)                           | 0.56 (0.47–0.64)   | 0.44 (0.36–0.53) |
| 1–4 serving per month        | 48/76                        | 0.61 (0.46–0.74)                           | 0.52 (0.38–0.66)   | 0.41 (0.28–0.56) |

Continued

**Supplementary Table SII** *Continued*

| Categories, range            | Number of unique FFQs/cycles | Adjusted proportions (95% CI) <sup>a</sup> |                    |                  |
|------------------------------|------------------------------|--------------------------------------------|--------------------|------------------|
|                              |                              | Implantation                               | Clinical pregnancy | Live birth       |
| 2–6 servings per week        | 21/41                        | 0.53 (0.34–0.71)                           | 0.44 (0.27–0.63)   | 0.22 (0.11–0.40) |
| ≥1 serving per day           | 9/15                         | 0.62 (0.34–0.84)                           | 0.59 (0.32–0.82)   | 0.51 (0.25–0.76) |
| <i>P</i> -trend <sup>b</sup> |                              | 0.69                                       | 0.93               | 0.87             |
| Tea                          |                              |                                            |                    |                  |
| <1 serving per month         | 120/186                      | 0.64 (0.54–0.73)                           | 0.56 (0.46–0.66)   | 0.42 (0.33–0.53) |
| 1–3 servings per month       | 44/70                        | 0.62 (0.47–0.75)                           | 0.51 (0.37–0.65)   | 0.41 (0.27–0.56) |
| 1–6 servings per week        | 98/151                       | 0.66 (0.56–0.76)                           | 0.56 (0.45–0.66)   | 0.46 (0.36–0.57) |
| 1 serving per day            | 25/39                        | 0.75 (0.56–0.87)                           | 0.70 (0.51–0.84)   | 0.44 (0.26–0.63) |
| ≥2 servings per day          | 26/47                        | 0.52 (0.34–0.69)                           | 0.41 (0.26–0.58)   | 0.32 (0.18–0.50) |
| <i>P</i> -trend <sup>b</sup> |                              | 0.25                                       | 0.22               | 0.29             |

The alcoholic beverages are adjusted for each other as well as total caffeine intake. The caffeinated beverages are adjusted for each other as well as total alcohol intake.

<sup>a</sup>Data are presented as predictive marginal means adjusted for age, BMI, infertility diagnosis, race, smoking status, calories, folate and vitamin B12 intake, dietary patterns, with continuous covariates at their mean level and categorical measures estimated at their reference level.

<sup>b</sup>Tests for trend were performed using the median level of each alcoholic and caffeinated beverage intake in each group as a continuous variable in the model.
